# Supplementary material
Source: MDPI journal article supplement (https://www.mdpi.com/2071-1050/13/11/5967)
Supplement: s1 [file s1]

## Supplementary Materials

**Table S1.** Data Sources used in Remote Evaluation of Food Production and Agriculture.

| Variable                               | Sensor or Data Product                                            | Resolution  | Time Step         | Time Period    |
|----------------------------------------|-------------------------------------------------------------------|-------------|-------------------|----------------|
| Moderate resolution<br>Optical imagery | Suomi NPP VIIRS                                                   | 375m        | Daily             | 2011 - present |
|                                        | Terra and Aqua MODIS                                              | 250m        | Daily             | 2000 - present |
|                                        | Sentinel 2a/b                                                     | 10m         | 3-5 days          | 2016 - present |
|                                        | SPOT-VEGETATION                                                   | 1000m       | 10-day composites | 1998 - present |
| Rainfall                               | CHIRPS                                                            | 0.05 degree | Daily             | 1980 - present |
| Temperature                            | Princeton Labs                                                    | 10km        | Daily             | 1979-2008      |
|                                        | CHIRTS                                                            | 0.05 degree | Daily             | 1982-2016      |
| Soil Moisture                          | ESA Climate Change Initiative (CCI) combined active/passive       | 0.25 degree | Daily             | 1991-2019      |
| Very high resolution optical imagery   | Corona<br>WorldView 1, 2,<br>Ikonos,<br>Quickbird,<br>Planet Labs | 0.3-5 m     | Varies            | Varies         |
